# Supplementary material
Source: HighWire-hosted journal article supplement (https://erj.ersjournals.com/content/56/1/2001361)
Supplement: inline-supplementary-material-1 [file inline-supplementary-material-1.pdf]

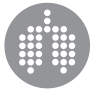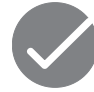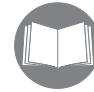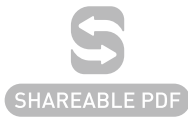

# Go slow to go fast: a plea for sustained scientific rigour in air pollution research during the COVID-19 pandemic

Dick J.J. Heederik, Lidwien A.M. Smit  and Roel C.H. Vermeulen

**Affiliation:** Division of Environmental Epidemiology, Institute for Risk Assessment Sciences, Utrecht University, Utrecht, The Netherlands.

**Correspondence:** Dick J.J. Heederik, Division of Environmental Epidemiology, Institute for Risk Assessment Sciences, Utrecht University, PO Box 80178, 3508TD Utrecht, The Netherlands. E-mail: d.heederik@uu.nl

 @ERSpublications

**Present studies on the role of air pollution and COVID-19 spread, and the prognosis in patients, do not fulfil quality criteria and are not sufficiently informative** <https://bit.ly/3hGjd73>

**Cite this article as:** Heederik DJJ, Smit LAM, Vermeulen RCH. Go slow to go fast: a plea for sustained scientific rigour in air pollution research during the COVID-19 pandemic. *Eur Respir J* 2020; 56: 2001361 [<https://doi.org/10.1183/13993003.01361-2020>].

This single-page version can be shared freely online.

Researchers in the air pollution field are well aware that indoor and outdoor air pollution is associated with multiple disorders, including an increase in respiratory infection-related morbidity and mortality [1, 2]. Investigating associations linking air pollution and coronavirus disease 2019 (COVID-19) spread and prognosis of respiratory disease in COVID-19 patients is therefore timely, relevant and plausible. Over a 10-day period, three papers involving original research associating COVID-19 mortality and air pollution were published [3–5]. These publications attracted considerable attention from international news outlets and on social media [6, 7].
